# Supplementary material for: Long-Term Tetrabromobisphenol A Exposure Induces Gut Microbiota Imbalance and Metabolic Disorders via the Peroxisome Proliferator-Activated Receptor Signaling Pathway in the Regenerated Gut of Apostichopus japonicus
Source: MDPI journal article supplement (doi:10.3390/biology12111365), 2023-10-25
Supplement: s1 [file s1]

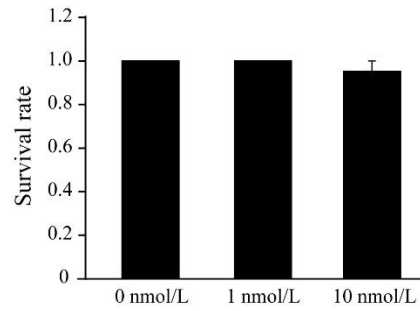

Figure S1: Survival of *A. japonicus* after TBBPA challenge.

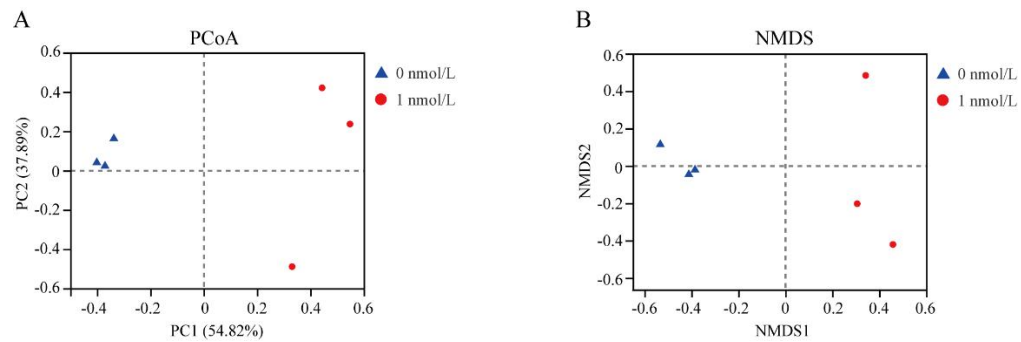

Figure S2. Beta diversity analysis was used to assess differences in microbial composition in the regenerated intestine of *A. japonicus* after TBBPA challenge.

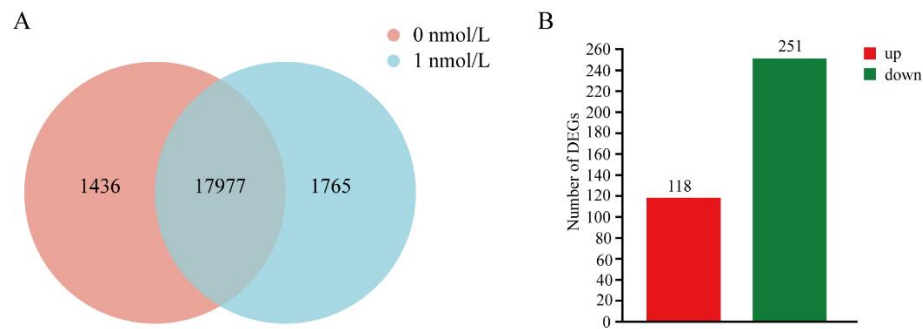

Figure S3. The number of annotated genes and differentially expressed genes after the TBBPA challenge.

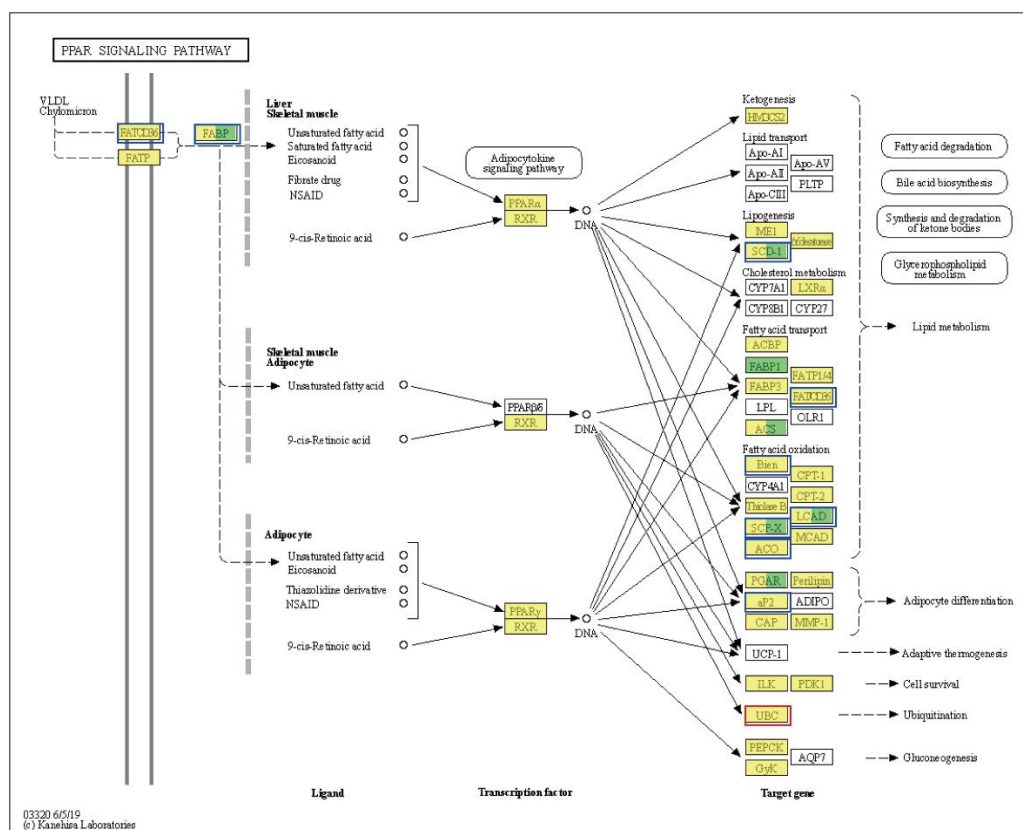

Figure S4. Overview of PPAR signaling pathway by KEGG enrichment analysis.

Table S1. Summary of RNAseq data.

| Sample ID  | Read Number | Base Number | GC Content % | Q30   | Mapped Ratio |
|------------|-------------|-------------|--------------|-------|--------------|
| 0 nmol/L-1 | 43996224    | 6523770887  | 39.14        | 91.63 | 0.9729       |
| 0 nmol/L-2 | 42730754    | 6209159044  | 40.76        | 93.46 | 0.9731       |
| 0 nmol/L-3 | 42713958    | 6221981364  | 40.05        | 93.24 | 0.9704       |
| 1 nmol/L-1 | 40410944    | 5976185129  | 39.94        | 90.14 | 0.9739       |
| 1 nmol/L-2 | 42266526    | 6260927283  | 39.82        | 92.45 | 0.9742       |
| 1 nmol/L-3 | 42567906    | 6292766917  | 37.93        | 92.28 | 0.9722       |

Table S2. The primes were used in this study.

| Prime name | Sequences (5'--3')     |
|------------|------------------------|
| β-actin-F  | AAGTTATGCTCTTCCTCAGCT  |
| β-actin-R  | GATGTCACGGACGATTTCACG  |
| SCD3-F     | AGGTGGTGGTATTGATTGC    |
| SCD3-R     | GGAGGTAGGTCGGAAGAA     |
| EHHADH-F   | GATGAGTTGGCAGATATG     |
| EHHADH-R   | GTCTTCCTCTTACATTCTC    |
| SCP2-F     | CATTAGAATCCGACCAGTAGAG |
| SCP2-R     | TCGCTGTCTGTCATCGTA     |
| FABP-F     | GCGATTGTTGGTGCTCTT     |

---

|           |                        |
|-----------|------------------------|
| FABP-R    | CGTCTGCCTTGAACCTTCTC   |
| UBB-F     | TGGTGGACAAGGAAGGTAT    |
| UBB-R     | AGACGAAGGACAAGATGGA    |
| SCD2-F    | ACAGCACAGAATGAACCGAAG  |
| SCD2-R    | AGGATAGTGACGCAATGATAGC |
| SCD1-F    | GCCTGTCCTGTCAGAACTCC   |
| SCD1-R    | TTACCCAAAGCCAACCCAT    |
| FATCD36-F | TGTGCCAGTGCTACATTACG   |
| FATCD36-R | CATGCCTTCAACCATATCCA   |
| ACADL-F   | TAGGAGCCGCTGGTTTCTT    |
| ACADL-R   | TCTCCTTCTGTTCTGCGGTG   |
| FASN-F    | AATGGTCTGGTGCGTCTTA    |
| FASN-R    | TATGGTGATGGCGTTGGA     |

---
